# Supplementary material for: Temporal Associations Between Social Activity and Mood, Fatigue, and Pain in Older Adults With HIV: An Ecological Momentary Assessment Study
Source: PubMed Central journal article supplement (PMC5972192; doi:10.2196/mental.9802), 2018-05-14
Supplement: mental_v5i2e38_app1.pdf [file mental_v5i2e38_app1.pdf]

| Mixed-effects model comparison | AIC  | Log Likelihood | deviance | Chi-square | DF | p-value |
|--------------------------------|------|----------------|----------|------------|----|---------|
| <i>Sad</i>                     |      |                |          |            |    |         |
| Continuous time                | 1650 | -821.236       | 1642     | 0.457      | 3  | 0.93    |
| Categorical time               | 1656 | -821.007       | 1642     |            |    |         |
| <i>Happy</i>                   |      |                |          |            |    |         |
| Continuous time                | 1663 | -827.387       | 1655     | 0.587      | 3  | 0.90    |
| Categorical time               | 1663 | -827.094       | 1654     |            |    |         |
| <i>Stress</i>                  |      |                |          |            |    |         |
| Continuous time                | 1599 | -795.281       | 1591     | 15.3       | 3  | 0.002   |
| Categorical time               | 1589 | -787.623       | 1575     |            |    |         |
| <i>Fatigue</i>                 |      |                |          |            |    |         |
| Continuous time                | 1972 | -982.231       | 1964     | 12.8       | 3  | 0.005   |
| Categorical time               | 1966 | -975.813       | 1952     |            |    |         |
| <i>Pain</i>                    |      |                |          |            |    |         |
| Continuous time                | 1616 | -804.168       | 1608     | 4.259      | 3  | 0.23    |
| Categorical time               | 1618 | -802.039       | 1604     |            |    |         |
